# Supplementary material for: Facile synthesis of N,O-codoped hard carbon on the kilogram scale for fast capacitive sodium storage
Source: Royal Society of Chemistry journal article supplement (doi:10.1039/c8ta06160b), 2018-01-01
Supplement: c8ta06160b1.pdf [file c8ta06160b1.pdf]

## **Electronic Supplementary Material**

### **Facile Synthesis of N,O-Codoped Hard Carbon at the Kilogram Scale for Fast Capacitive Sodium Storage**

Man Huang,<sup>1</sup> Baojuan Xi,<sup>1</sup> Zhenyu Feng,<sup>1</sup> Jing Liu,<sup>2</sup> Jinkui Feng,<sup>3</sup> Yitai Qian,<sup>1,4</sup> and Shenglin Xiong<sup>1\*</sup>

<sup>1</sup>Key Laboratory of the Colloid and Interface Chemistry, Ministry of Education, and School of Chemistry and Chemical Engineering, Shandong University, Jinan, 250100, PR China

<sup>2</sup>College of Materials Science and Engineering, Qingdao University of Science and Technology, Qingdao 266042, China

<sup>3</sup>Key Laboratory for Liquid-Solid Structural Evolution & Processing of Materials (Ministry of Education), School of Materials Science and Engineering, Shandong University, Jinan 250061, PR China

<sup>4</sup>Hefei National Laboratory for Physical Sciences at the Microscale, University of Science and Technology of China, Hefei, 230026, PR China

\*Correspondence and requests for materials should be addressed to S.L.X. (email: chexsl@sdu.edu.cn).

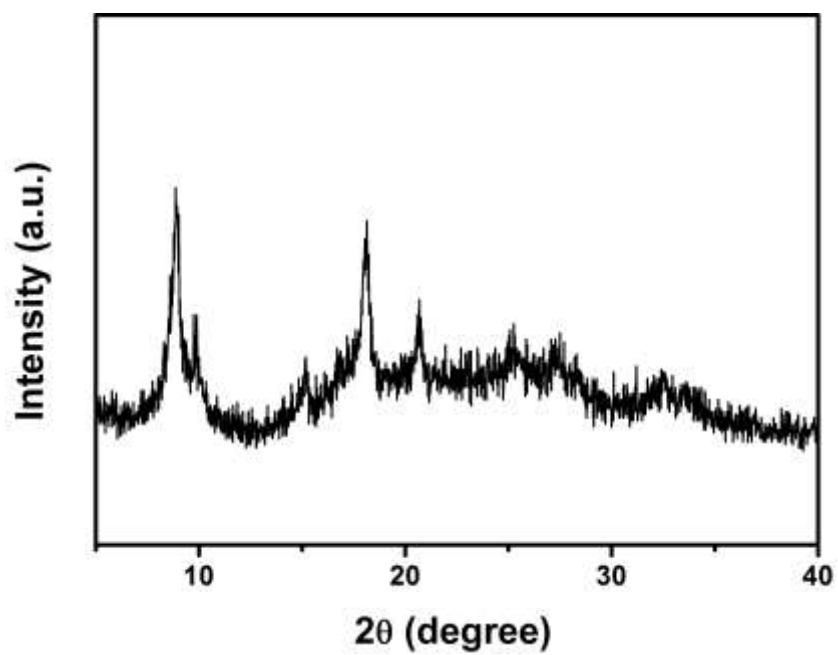

**Figure S1.** XRD pattern of HP-MIL-NH<sub>2</sub>-53(Al).

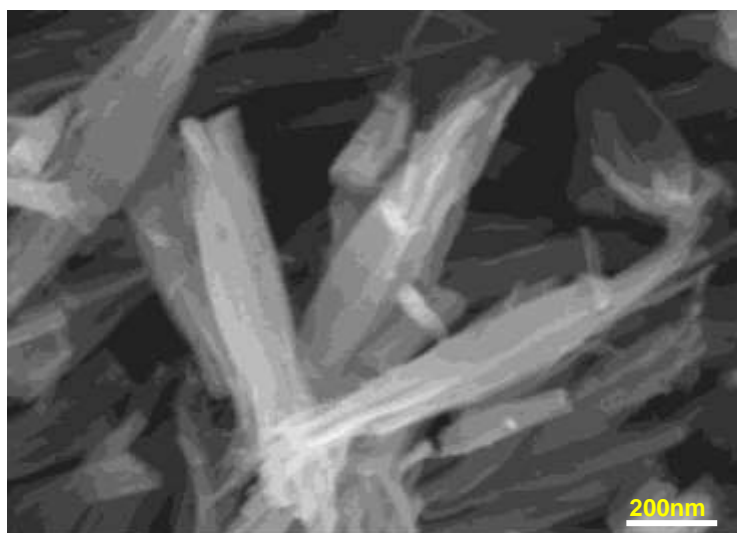

**Figure S2.** SEM image of the HP-MIL-NH<sub>2</sub>-53(Al) precursor.

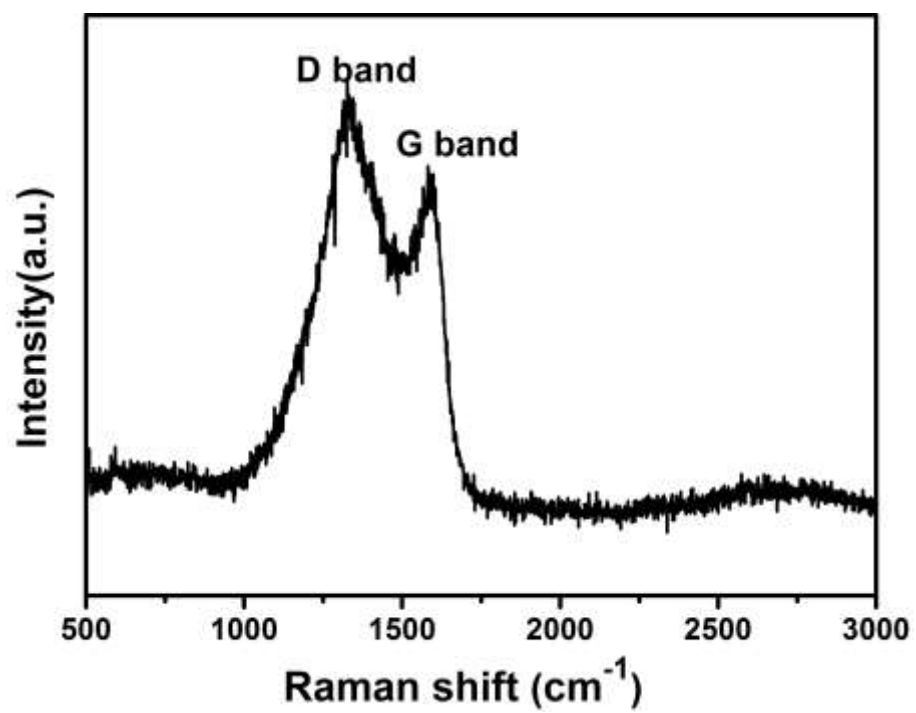

**Figure S3.** Raman spectrum of NOHPHC cuttlefishes.

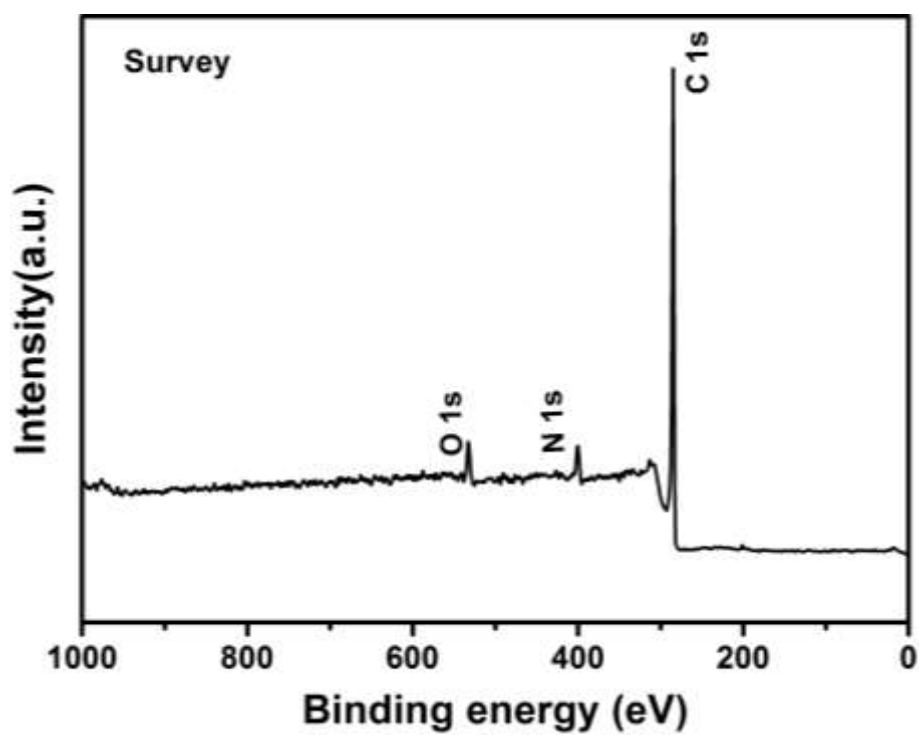

**Figure S4.** XPS survey spectrum of the NOHPHC cuttlefishes.

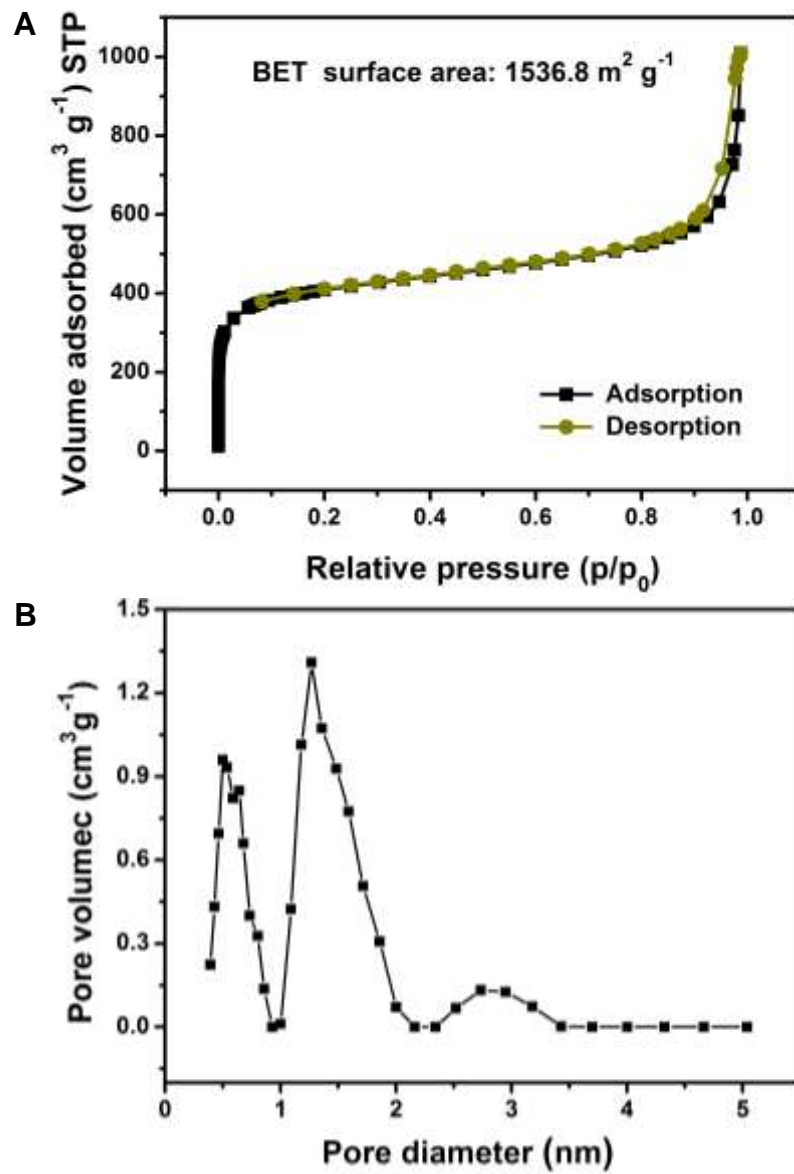

**Figure S5.**  $\text{N}_2$  adsorption/desorption isotherm (A) and the corresponding pore size distribution (B) of NOHPHC cuttlefishes.

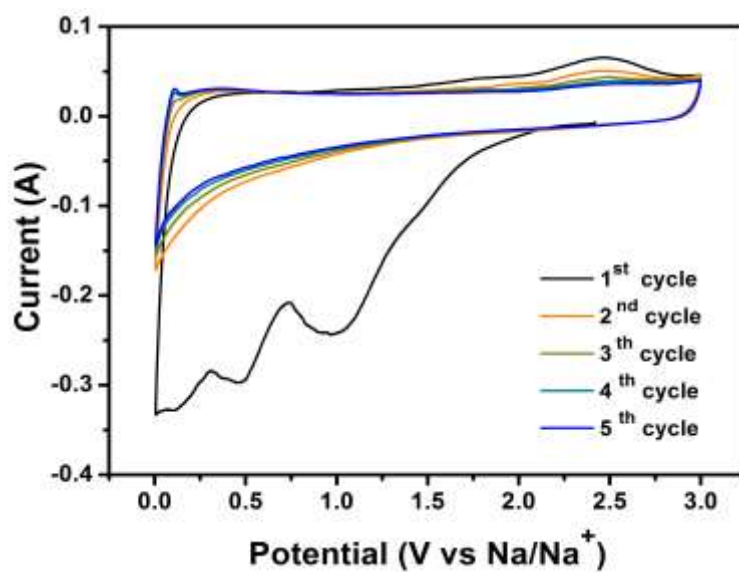

**Figure S6.** CV curves of the NOHPHC cuttlefishes in the voltage window of 0.005–3.0 V vs. Na/Na<sup>+</sup> at a scan rate of 0.1 mV s<sup>-1</sup>.

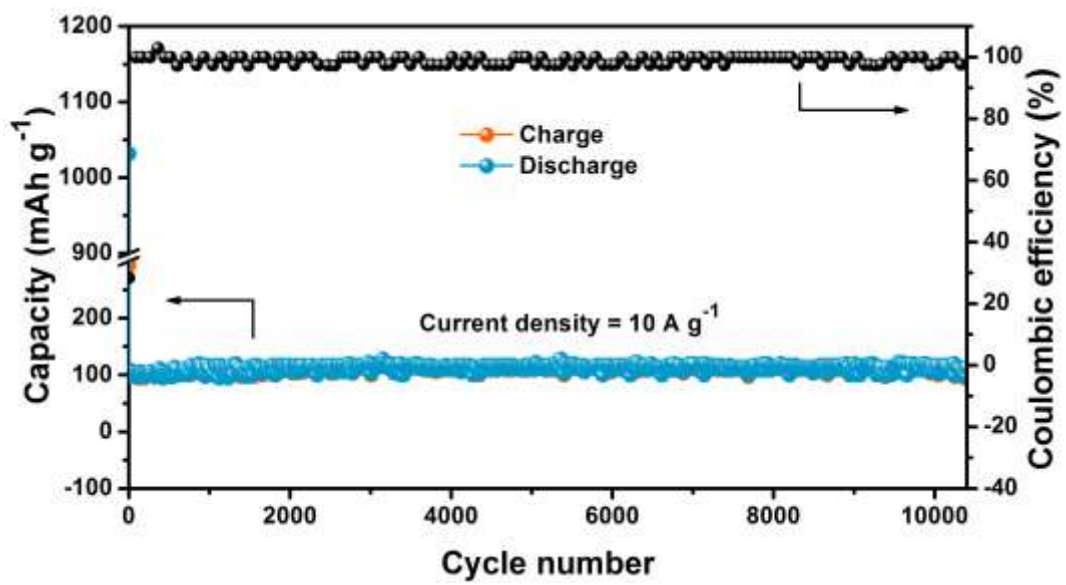

**Figure S7.** Long-term cycling performance of the NOHPHC electrode at a current density of 10 A g<sup>-1</sup>.

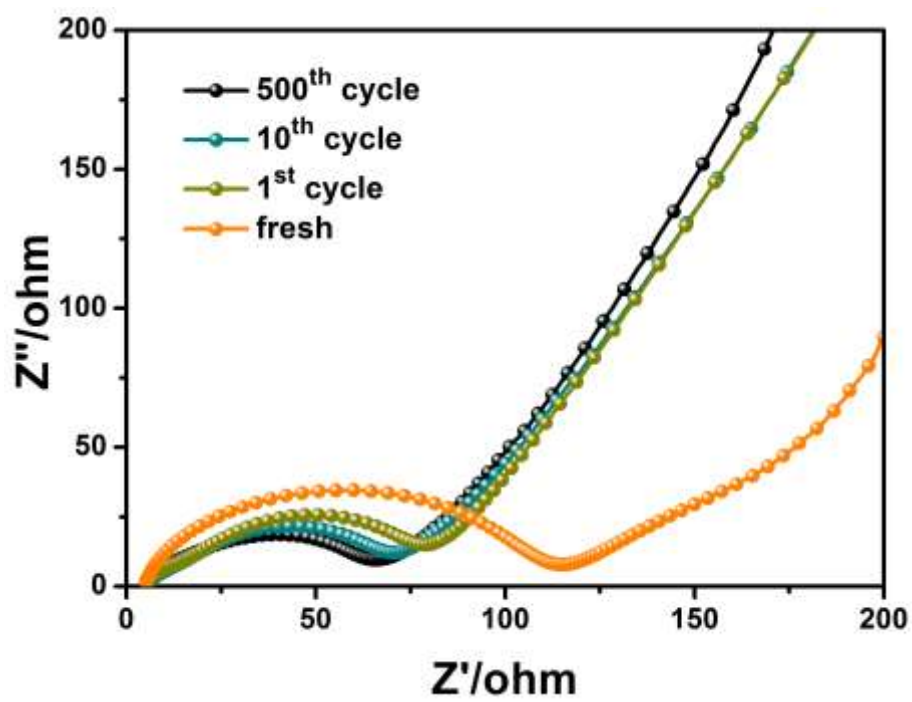

**Figure S8.** Electrochemical impedance spectra (EIS) of the NOHPHC electrode after different cycles at a current density of  $0.2 \text{ A g}^{-1}$ .



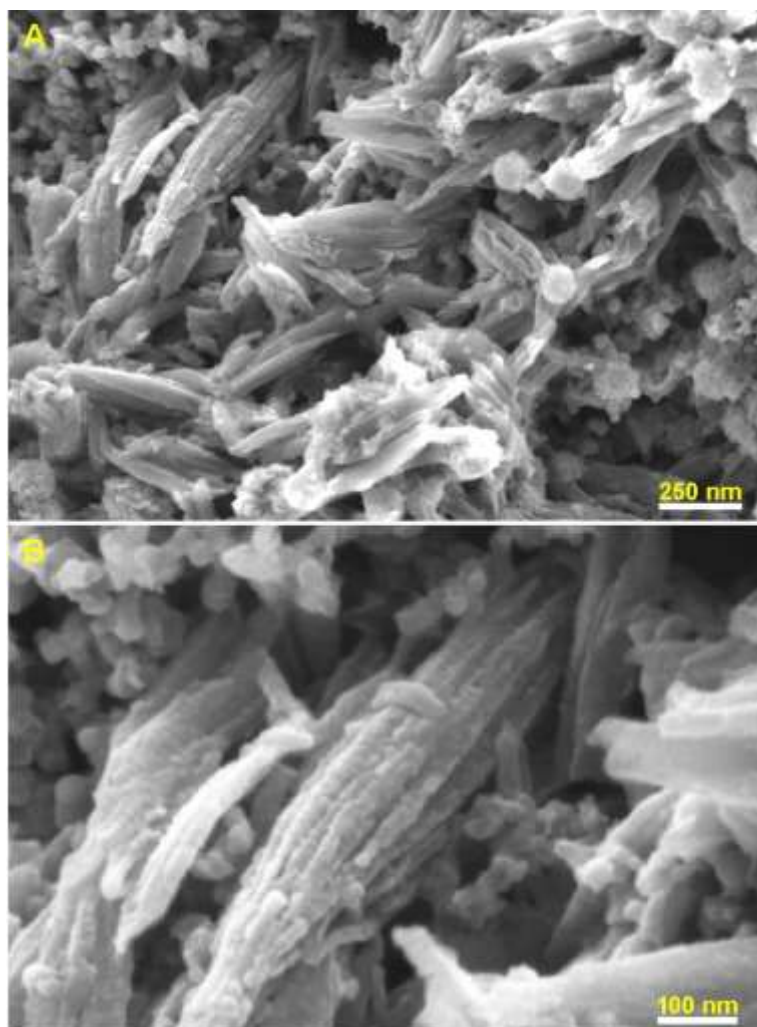

**Figure S9.** FESEM images of the NOHPHC electrode after 100 cycles at  $0.5 \text{ A g}^{-1}$ .

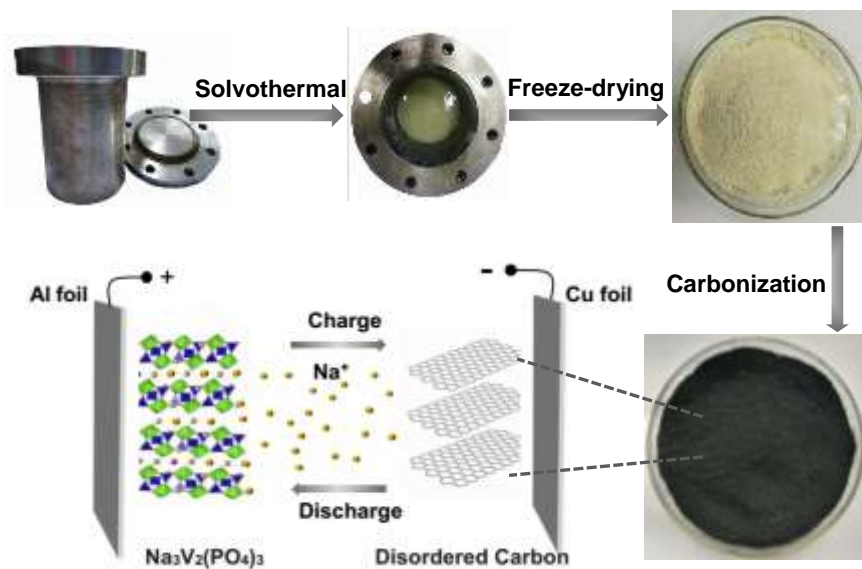

**Figure S10.** The kilogram-scale preparation illustration of the NOHPHC cuttlefishes. (Note: The diameter of the autoclave is approximately 20 cm, and the volume of the glass beaker is 2 L.)

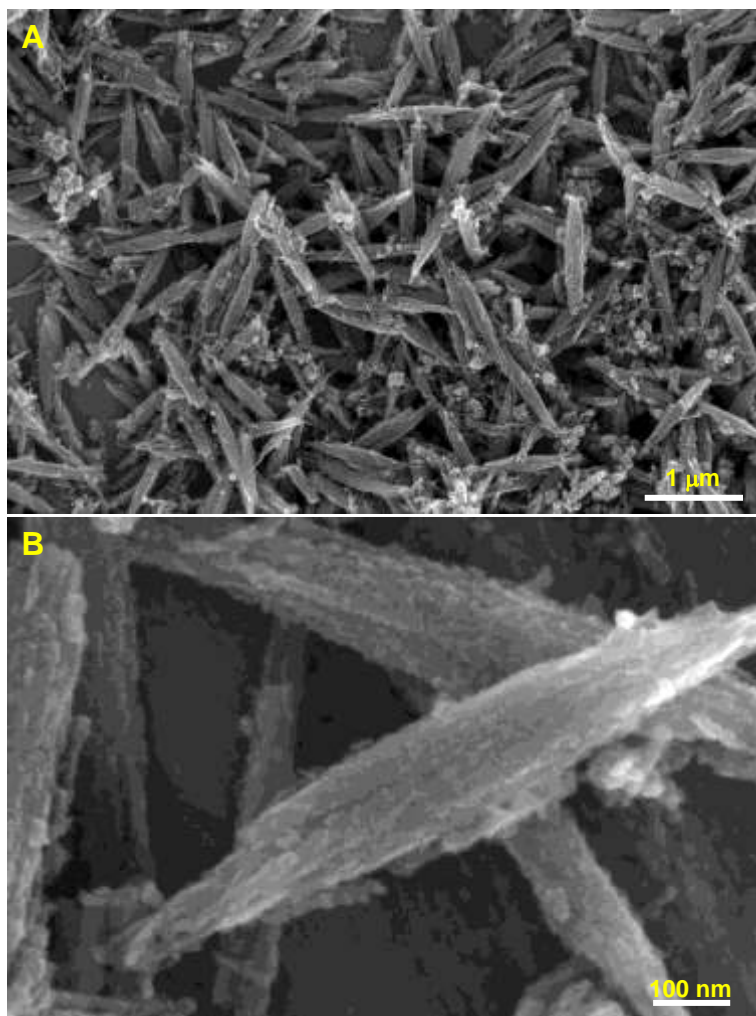

**Figure S11.** FESEM images of the NOHPHC-K cuttlefishes.

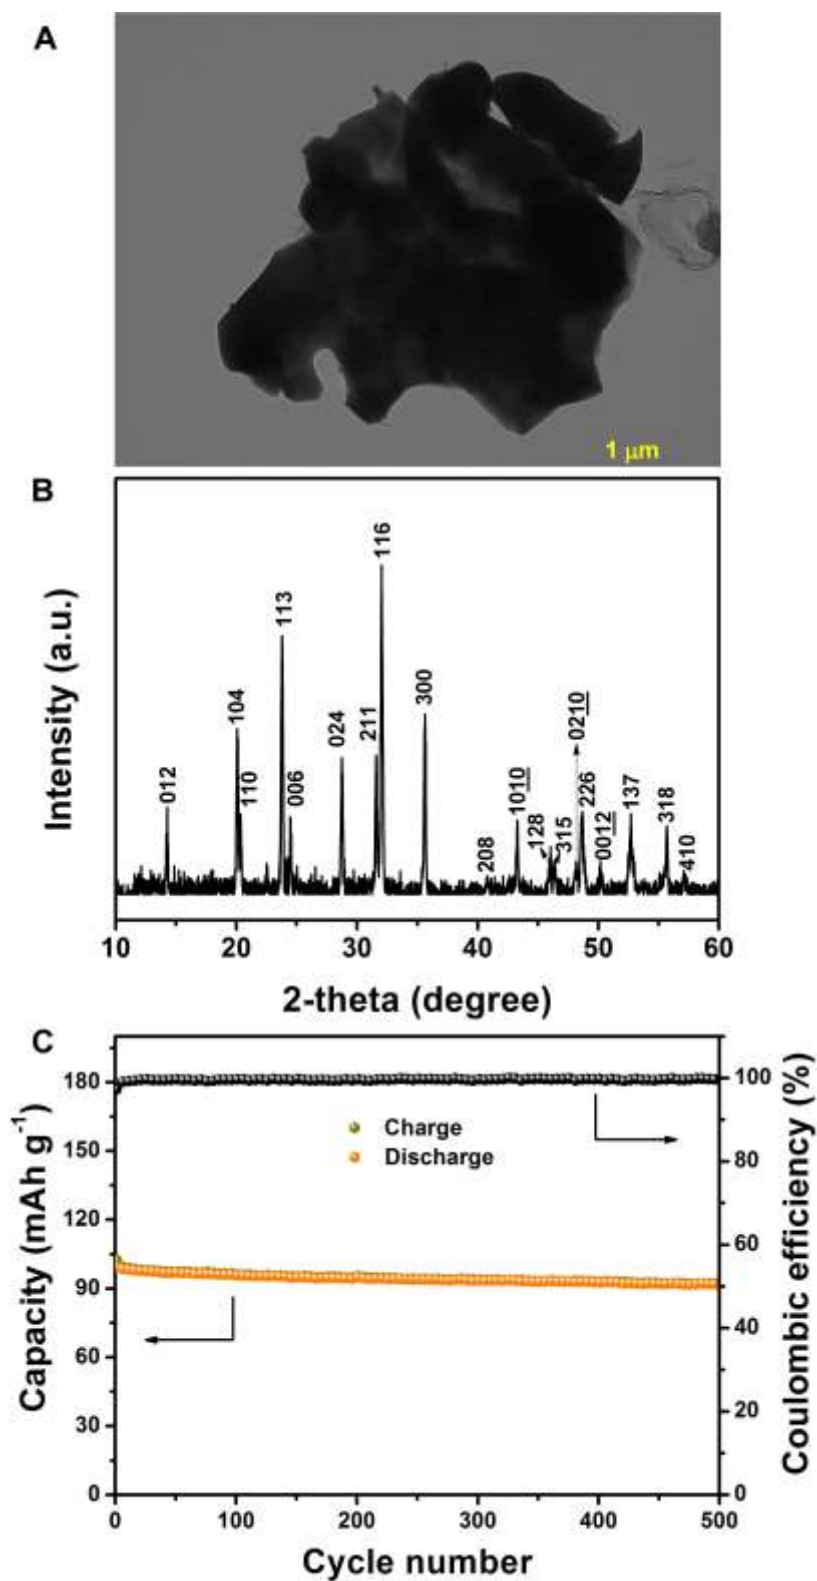

**Figure S12.** TEM image (A) and XRD pattern (B) of the homemade  $\text{Na}_3\text{V}_2(\text{PO}_4)_3/\text{C}$ . (C) Cycling performance at a current density of  $100\ \text{mA g}^{-1}$ .

**Table S1.** Cyclability (discharge capacity) and the rate performance comparison of NOHPHC versus representative carbon materials in SIBs reported.

| material                  | cyclability (discharge capacity)                                                                                                                                                 | rate performance                                                                                                                                                                                                                                            | Ref.             |
|---------------------------|----------------------------------------------------------------------------------------------------------------------------------------------------------------------------------|-------------------------------------------------------------------------------------------------------------------------------------------------------------------------------------------------------------------------------------------------------------|------------------|
| <b>NOHPHC</b>             | 112.5 mAh g <sup>-1</sup> at 11 <sup>th</sup> cycle<br>113 mAh g <sup>-1</sup> at 30000 <sup>th</sup> cycle<br>~100% capacity retention over 30000 cycles at 5 A g <sup>-1</sup> | 143 mAh g <sup>-1</sup> at 1 A g <sup>-1</sup><br>128 mAh g <sup>-1</sup> at 2 A g <sup>-1</sup><br>109 mAh g <sup>-1</sup> at 5 A g <sup>-1</sup><br>100 mAh g <sup>-1</sup> at 10 A g <sup>-1</sup><br>98 mAh g <sup>-1</sup> at 20 A g <sup>-1</sup>     | <b>This work</b> |
| biomedical carbon         | 342 mAh g <sup>-1</sup> at 11 <sup>th</sup> cycle<br>298 mAh g <sup>-1</sup> at 300 <sup>th</sup> cycle<br>88% capacity retention over 290 cycles at 100 mA g <sup>-1</sup>      | 290 mAh g <sup>-1</sup> at 200 mA g <sup>-1</sup><br>238 mAh g <sup>-1</sup> at 500 mA g <sup>-1</sup><br>155 mAh g <sup>-1</sup> at 1 A g <sup>-1</sup><br>100 mAh g <sup>-1</sup> at 2 A g <sup>-1</sup><br>70 mAh g <sup>-1</sup> at 5 A g <sup>-1</sup> | [S1]             |
| hard carbon               | 340 mAh g <sup>-1</sup> at 2 <sup>nd</sup> cycle<br>310 mAh g <sup>-1</sup> at 120 <sup>th</sup> cycle<br>88% capacity retention over 118 cycles at ~30 mA g <sup>-1</sup>       | 300 mAh g <sup>-1</sup> at 100 mA g <sup>-1</sup><br>240 mAh g <sup>-1</sup> at ~300 mA g <sup>-1</sup><br>150 mAh g <sup>-1</sup> at ~600 mA g <sup>-1</sup>                                                                                               | [S2]             |
| Nanocellular carbon foams | 153 mAh g <sup>-1</sup> at 2 <sup>nd</sup> cycle<br>137 mAh g <sup>-1</sup> at 300 <sup>th</sup> cycle<br>90% capacity retention over 298 cycles at 100 mA g <sup>-1</sup>       | 140 mAh g <sup>-1</sup> at 200 mA g <sup>-1</sup><br>120 mAh g <sup>-1</sup> at 500 mA g <sup>-1</sup><br>100 mAh g <sup>-1</sup> at 1 A g <sup>-1</sup>                                                                                                    | 50               |
| templated carbon          | 180 mAh g <sup>-1</sup> at 2 <sup>nd</sup> cycle,<br>120 mAh g <sup>-1</sup> at 40 <sup>th</sup> cycle<br>66.7% capacity retention over 38 cycles at 74 mA g <sup>-1</sup>       | 140 mAh g <sup>-1</sup> at 74 mA g <sup>-1</sup><br>120 mAh g <sup>-1</sup> at 740 mA g <sup>-1</sup><br>100 mAh g <sup>-1</sup> at 1.85 A g <sup>-1</sup>                                                                                                  | [S3]             |
| highly disordered carbon  | 255 mAh g <sup>-1</sup> at initial cycles<br>234 mAh g <sup>-1</sup> at 180 <sup>th</sup> cycle<br>92% capacity retention over 170 cycles at 100 mA g <sup>-1</sup>              | 190 mAh g <sup>-1</sup> at 200 mA g <sup>-1</sup><br>139 mAh g <sup>-1</sup> at 500 mA g <sup>-1</sup><br>102 mAh g <sup>-1</sup> at 1 A g <sup>-1</sup>                                                                                                    | 51               |
| porous carbon nanofiber   | 280 mAh g <sup>-1</sup> at 10 <sup>th</sup> cycle<br>266 mAh g <sup>-1</sup> at 100 <sup>th</sup> cycle<br>95% capacity retention over 90 cycles at 50 mA g <sup>-1</sup>        | 225 mAh g <sup>-1</sup> at 500 mA g <sup>-1</sup><br>200 mAh g <sup>-1</sup> at 1 A g <sup>-1</sup><br>164 mAh g <sup>-1</sup> at 2 A g <sup>-1</sup>                                                                                                       | 52               |
| hollow carbon nanowires   | 255 mAh g <sup>-1</sup> at 10 <sup>th</sup> cycle<br>220 mAh g <sup>-1</sup> at 200 <sup>th</sup> cycle                                                                          | 210 mAh g <sup>-1</sup> at 250 mA g <sup>-1</sup>                                                                                                                                                                                                           | [S4]             |

|                                  |                                                                                                                                                                                    |                                                                                                                                                          |    |
|----------------------------------|------------------------------------------------------------------------------------------------------------------------------------------------------------------------------------|----------------------------------------------------------------------------------------------------------------------------------------------------------|----|
|                                  | 86% capacity retention over 190 cycles at 50 mA g <sup>-1</sup>                                                                                                                    | 149 mAh g <sup>-1</sup> at 500 mA g <sup>-1</sup>                                                                                                        |    |
| hollow carbon nanospheres        | 250 mAh g <sup>-1</sup> at 10 <sup>th</sup> cycle<br>160 mAh g <sup>-1</sup> at 100 <sup>th</sup> cycle<br>64% capacity retention over 90 cycles at 100 mA g <sup>-1</sup>         | 168 mAh g <sup>-1</sup> at 200 mA g <sup>-1</sup><br>142 mAh g <sup>-1</sup> at 500 mA g <sup>-1</sup><br>120 mAh g <sup>-1</sup> at 1 A g <sup>-1</sup> | 53 |
| carbon nanosheets                | ca. 260 mAh g <sup>-1</sup> at 10 <sup>th</sup> cycle<br>ca. 155 mAh g <sup>-1</sup> at 200 <sup>th</sup> cycle<br>60% capacity retention over 190 cycles at 50 mA g <sup>-1</sup> | 190 mAh g <sup>-1</sup> at 200 mA g <sup>-1</sup><br>125 mAh g <sup>-1</sup> at 500 mA g <sup>-1</sup><br>80 mAh g <sup>-1</sup> at 1A g <sup>-1</sup>   | 54 |
| interconnected carbon nanofibers | 151 mAh g <sup>-1</sup> at 10 <sup>th</sup> cycle<br>134.2 mAh g <sup>-1</sup> at 200 <sup>th</sup> cycle<br>88.7% capacity retention over 190 cycles at 200 mA g <sup>-1</sup>    | 150 mAh g <sup>-1</sup> at 200 mA g <sup>-1</sup><br>139 mAh g <sup>-1</sup> at 500 mA g <sup>-1</sup><br>132 mAh g <sup>-1</sup> at 1 A g <sup>-1</sup> | 55 |
| carbonized peat moss             | 284 mAh g <sup>-1</sup> at 10 <sup>th</sup> cycle<br>255 mAh g <sup>-1</sup> at 210 <sup>th</sup> cycle<br>90% capacity retention over 200 cycles at 100 mA g <sup>-1</sup>        | 250 mAh g <sup>-1</sup> at 200 mA g <sup>-1</sup><br>203 mAh g <sup>-1</sup> at 500 mA g <sup>-1</sup><br>150 mAh g <sup>-1</sup> at 1 A g <sup>-1</sup> | 56 |
| carbon nanofibers                | 200 mAh g <sup>-1</sup> at 2 <sup>nd</sup> cycle<br>180 mAh g <sup>-1</sup> at 300 <sup>th</sup> cycle<br>90% capacity retention over 298 cycles at 200 mA g <sup>-1</sup>         | 200 mAh g <sup>-1</sup> at 200 mA g <sup>-1</sup><br>160 mAh g <sup>-1</sup> at 500 mA g <sup>-1</sup><br>120 mAh g <sup>-1</sup> at 1 A g <sup>-1</sup> | 57 |
| carbon fibers                    | 350 mAh g <sup>-1</sup> at 2 <sup>nd</sup> cycle<br>243 mAh g <sup>-1</sup> at 100 <sup>th</sup> cycle<br>70% capacity retention over 98 cycles at 50 mA g <sup>-1</sup>           | 210 mAh g <sup>-1</sup> at 200 mA g <sup>-1</sup><br>175 mAh g <sup>-1</sup> at 500 mA g <sup>-1</sup><br>153 mAh g <sup>-1</sup> at 1 A g <sup>-1</sup> | 58 |
| Nitrogen-Doped Graphene Sheets   | 187.3 mAh g <sup>-1</sup> at 50 <sup>th</sup> cycle<br>247.5 mAh g <sup>-1</sup> at 500 <sup>th</sup> cycle<br>132.1% capacity retention over 450 cycles at 100 mA g <sup>-1</sup> | no reported                                                                                                                                              | S5 |
| sulfur-doped disordered carbon   | 561 mAh g <sup>-1</sup> at initial cycle<br>271 mAh g <sup>-1</sup> at 1000 <sup>th</sup> cycle 85.9% capacity retention over 990 cycles                                           | 275 mAh g <sup>-1</sup> at 800 mA g <sup>-1</sup><br>211 mAh g <sup>-1</sup> at 2A g <sup>-1</sup><br>158 mAh g <sup>-1</sup> at 14A g <sup>-1</sup>     | S6 |

---

| at 1 A g <sup>-1</sup>                 |                                                                                   |                                                                                                   |     |
|----------------------------------------|-----------------------------------------------------------------------------------|---------------------------------------------------------------------------------------------------|-----|
| N/S co-doped<br>macroporous carbon     | 482 mAh g <sup>-1</sup> at initial cycle                                          | 162 mAh g <sup>-1</sup> at 5A g <sup>-1</sup>                                                     | S7  |
|                                        | 480 mAh g <sup>-1</sup> at 500 <sup>th</sup> cycle                                | 255 mAh g <sup>-1</sup> at 2A g <sup>-1</sup>                                                     |     |
|                                        | 93% capacity retention over 490<br>cycles at 100 mA g <sup>-1</sup>               | 301 mAh g <sup>-1</sup> at 1A g <sup>-1</sup>                                                     |     |
| carbon quantum dots                    | 187.6 mAh g <sup>-1</sup> at initial cycle                                        | 90 mAh g <sup>-1</sup> at 20 A g <sup>-1</sup>                                                    | S8  |
|                                        | 150.1 mAh g <sup>-1</sup> at 3000 <sup>th</sup> cycle<br>at 2.5 A g <sup>-1</sup> | 104 mAh g <sup>-1</sup> at 10 A g <sup>-1</sup><br>130 mAh g <sup>-1</sup> at 5 A g <sup>-1</sup> |     |
|                                        |                                                                                   |                                                                                                   |     |
| Nitrogen-doped<br>carbon/graphene      | 303 mAh g <sup>-1</sup> at initial cycle                                          | 139 mAh g <sup>-1</sup> at 2 A g <sup>-1</sup>                                                    | S9  |
|                                        | 270 mAh g <sup>-1</sup> at 200 <sup>th</sup> cycle                                | 177 mAh g <sup>-1</sup> at 1 A g <sup>-1</sup>                                                    |     |
|                                        | 89% capacity retention over 190<br>cycles at 50 mA g <sup>-1</sup>                | 207 mAh g <sup>-1</sup> at 0.5 A g <sup>-1</sup>                                                  |     |
| 3D porous<br>carbon-coated<br>graphene | 824 mAh g <sup>-1</sup> at initial cycle                                          | 207 mAh g <sup>-1</sup> at 10 A g <sup>-1</sup>                                                   | S10 |
|                                        | 323 mAh g <sup>-1</sup> at 1000 <sup>th</sup> cycle                               | 218 mAh g <sup>-1</sup> at 5 A g <sup>-1</sup>                                                    |     |
|                                        | 89% capacity retention over 990<br>cycles at 50 mA g <sup>-1</sup>                | 251 mAh g <sup>-1</sup> at 2 A g <sup>-1</sup>                                                    |     |

---

- [1] E. M. Lotfabad, J. Ding, K. Cui, A. Kohandehghan, W. P. Kalisvaart, M. Hazelton, D. Mitlin, *ACS nano* **2014**, 8, 7115.
- [2] A. Ponrouch, A. R. Goñi, M. R. Palacín, *Electrochem. Commun.* **2013**, 27, 85.
- [3] S. Wenzel, T. Hara, J. Janek, P. Adelhelm, *Energy Environ. Sci.* **2011**, 4, 3342.
- [4] Y. Cao, L. Xiao, M. L. Sushko, W. Wang, B. Schwenzer, J. Xiao, Z. Nie, L. V. Saraf, Z. Yang, J. Liu, *Nano lett.* **2012**, 12, 3783.
- [5] L. L. Tian, S. B. Li, M. J. Zhang, S. K. Li, L. P. Lin, J. X. Zheng, Q. C. Zhuang, K. Amine, F. Pan, *ACS Appl. Mater. Interfaces* **2016**, 8, 26722.
- [6] W. Li, M. Zhou, H. Li, K. Wang, S. Cheng, K. Jiang, *Energy Environ. Sci.* **2015**, 8, 2916.
- [7] C. Yang, W. Li, Z. Yang, L. Gu, Y. Yu, *Nano Energy* **2015**, 18, 12.
- [8] H. Hou, C. E. Banks, M. Jing, Y. Zhang, X. Ji, *Adv. Mater.* **2015**, 27, 7861.
- [9] H. Liu, M. Jia, B. Cao, R. Chen, X. Lv, R. Tang, F. Wu, B. Xu, *J. Power Sources* **2016**, 319, 195.
- [10] D. Zhou, Y. Liu, W. L. Song, X. Li, L. Z. Fan, Y. Deng, *Chem. Eur. J.* **2017**, 316, 645.
